# Supplementary material for: Bile-duct proliferation as an unexpected side-effect after AAV2-LDLR gene transfer to rabbit liver
Source: PubMed Central journal article supplement (PMC6502883; doi:10.1038/s41598-019-43459-1), 2019-05-06
Supplement: 41598_2019_43459_MOESM1_ESM.pdf [file 41598_2019_43459_MOESM1_ESM.pdf]

## Supplementary information for

### **Bile-duct proliferation as an unexpected side-effect after AAV2-LDLR gene transfer to rabbit liver**

Hytönen Elisa<sup>1</sup>, Laurema Anniina<sup>1</sup>, Kankkonen Hanna<sup>2</sup>, Miyanohara Atsushi<sup>3</sup>, Kärjä Vesa<sup>4</sup>, Hujo Mika<sup>5</sup>, Laham-Karam Nihay<sup>1</sup> and Ylä-Herttuala Seppo<sup>1,6,7 \*</sup>

<sup>1</sup> A. I. Virtanen Institute for Molecular Sciences and Department of Medicine, University of Eastern Finland, Neulaniementie 2, FIN-70210 Kuopio, Finland.

<sup>2</sup> BioMediTech Institute and Faculty of Medicine and Life Sciences, University of Tampere, Tampere, Finland

<sup>3</sup> Department of Pediatrics, UC San Diego School of Medicine, La Jolla, CA, USA.

<sup>4</sup> Department of Pathology, University of Eastern Finland, Kuopio, Finland

<sup>5</sup> School of Computing, University of Eastern Finland, 70211 Kuopio, Finland

<sup>6</sup> Heart Center, Kuopio University Hospital and <sup>7</sup>) Gene Therapy Unit, Kuopio University Hospital, FIN-70210 Kuopio, Finland

\* Corresponding author:

Seppo Ylä-Herttuala, M.D., Ph.D. FESC; Professor of Molecular Medicine

A. I. Virtanen Institute for Molecular Sciences

University of Eastern Finland, P. O. Box 1627

**FIN-70211 KUOPIO, FINLAND**

Tel. +358-40-355 2075

Fax +358-17-163 751

E-mail: [Seppo.Ylaherttuala@uef.fi](mailto:Seppo.Ylaherttuala@uef.fi)

**Supplementary Table S1. Pathological changes in liver 1 and 12 months after gene transfer**

| Change in liver                            | AAV2-LDLR |      | AAV2-control |      | AAV9-LDLR |      | AAV9-control |      | lenti-LDLR | lenti-control |
|--------------------------------------------|-----------|------|--------------|------|-----------|------|--------------|------|------------|---------------|
|                                            | 1 mo      | 12mo | 1mo          | 12mo | 1mo       | 12mo | 1mo          | 12mo | 12mo       | 12mo          |
| Bile duct proliferation                    | –         | ++   | –            | +    | +         | –    | +            | +    | –          | –             |
| Macrovesicular steatosis                   | +         | ++   | ++           | +    | ++        | ++   | ++           | ++   | –          | +             |
| Microvesicular steatosis                   | ++        | ++   | ++           | +++  | ++        | ++   | ++           | +++  | –          | +             |
| Stasis                                     | +         | +    | +            | +    | +         | +    | –            | +    | –          | –             |
| Lymphocytes in portal fields               | –         | +    | –            | +    | –         | –    | –            | –    | –          | –             |
| Ballooning degeneration                    | +         | –    | ++           | –    | ++        | –    | ++           | +    | –          | +++           |
| Inclusions                                 | +         | –    | +            | –    | –         | –    | –            | +    | –          | +             |
| Bile-duct intraepithelial lymphocytes      | ++        | +    | ++           | +    | +         | +    | +            | +    | +          | +             |
| Eosinophilic granulocytes in portal fields | –         | +    | –            | +    | +         | +    | +            | +    | –          | –             |
| Interphase inflammation                    | –         | –    | –            | –    | –         | –    | –            | –    | –          | –             |

Liver histology was evaluated from hematoxylin and eosin stained sections. Slides were scored on a semi-quantitative scale by a pathologist (V.K.) blinded to the origin of the samples. Four slides from each individual animal were scored twice, the average/animal was calculated and from these the average for each treatment group was calculated. – no change; + mild change; ++ moderate change and +++ abundant change.

**a**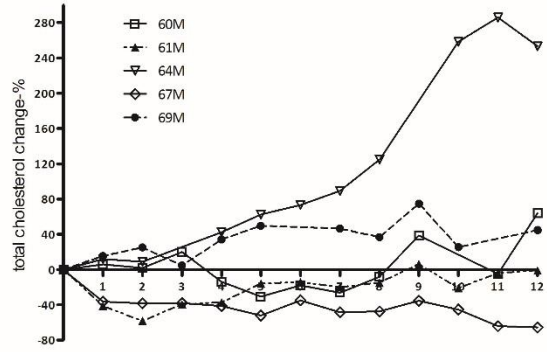**b**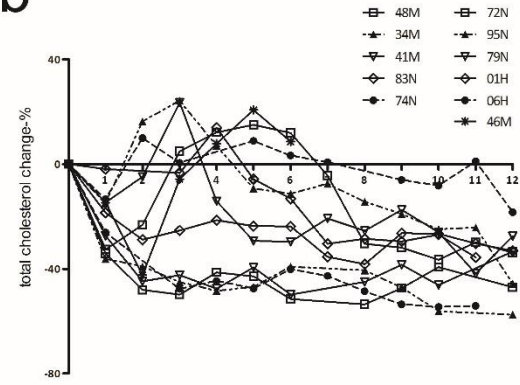**c**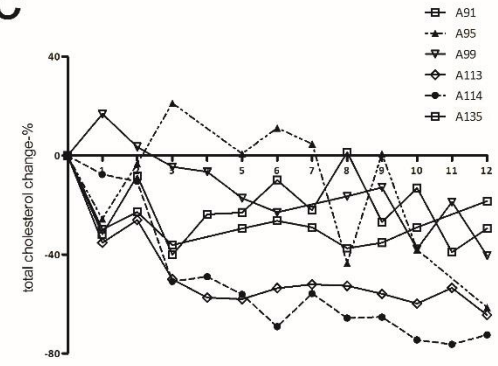**d**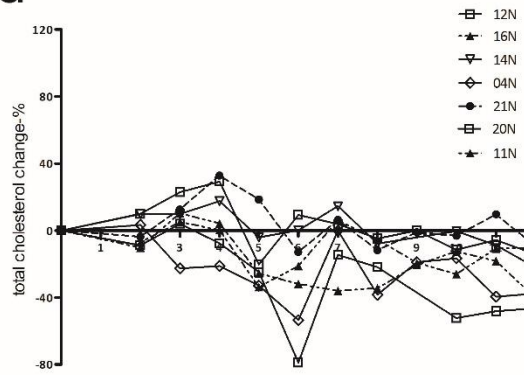**e**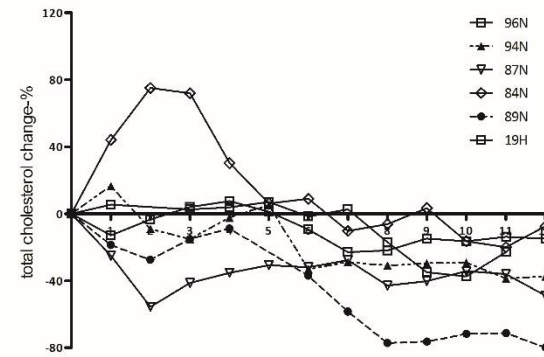**f**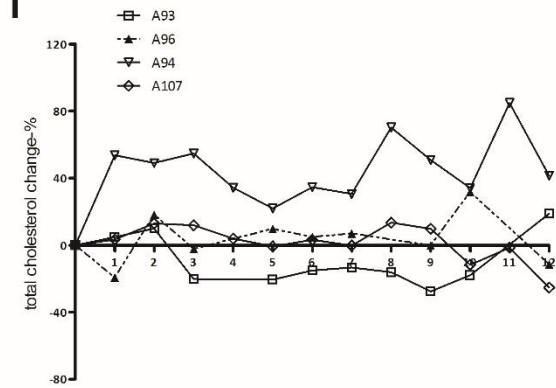

**Supplementary Figure S1. Long-term follow-up of total cholesterol values of individual animals after intraportal gene transfer.** Total cholesterol, represented as % change from pre-treatment values, for each animal is shown over a 1-year period (1-12 months). Figure S1 (a) represents AAV2-LDLR, (b) AAV9-LDLR, (c) lenti-LDLR, (d) AAV2-control, (e) AAV9-control and (f) lenti-control.

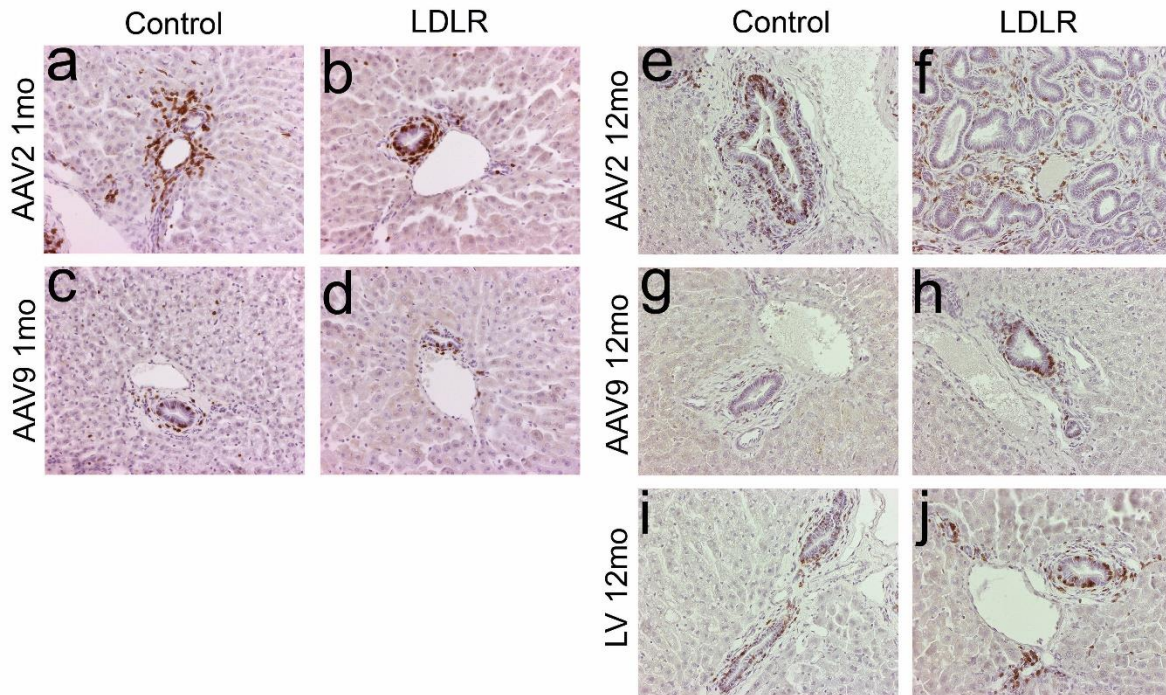

**Supplementary figure S2. Immunohistochemical staining for lymphocytes in representative liver samples one month and one year after gene transfer.** Bile duct intraepithelial lymphocytes (IEL) and lymphocytes in portal fields were identified with immunostaining with an antibody against rabbit T-lymphocytes. IELs were most prominent in AAV2 transduced rabbits one month after gene transfer (a and b) whereas the levels of IELs were similar in all groups at the end of the follow-up (e-j). Magnification 200x.

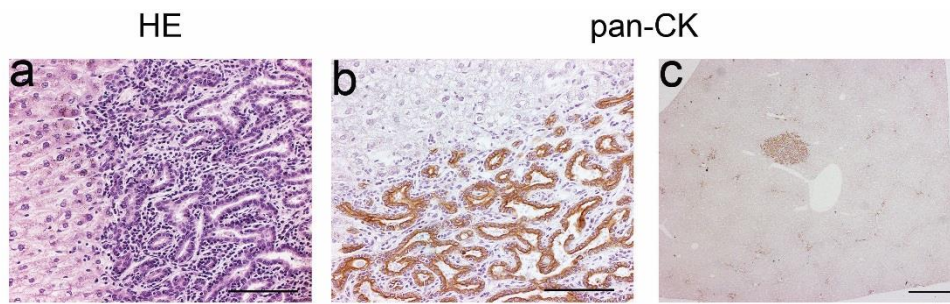

**Supplementary Figure S3. Characterization of adenoma in lenti-control transduced WHHL rabbit.** HE-staining (a) and pan-CK immunohistochemistry (b and c) show tubular structure of single adenoma found in one lenti-control transduced animal. Magnification (a, b) 200X, scale bar 100  $\mu\text{m}$  and (c) 12.5x, scale bar 1000  $\mu\text{m}$ .

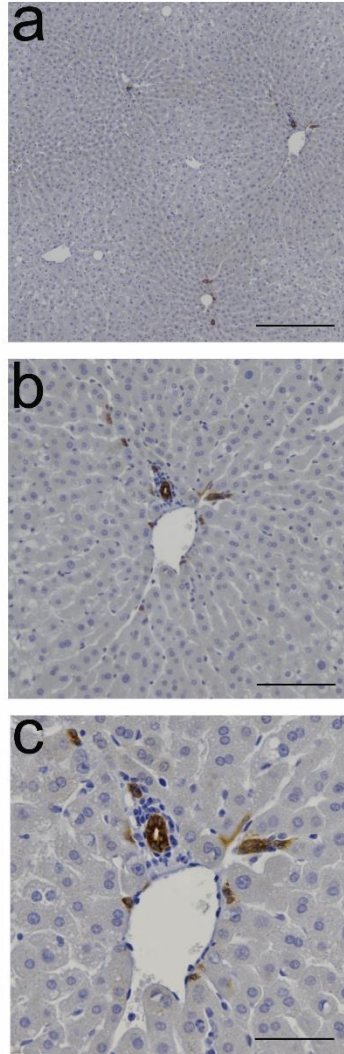

**Supplementary Figure S4. Immunohistochemical staining for pan-cytokeratin in normal rabbit liver.** Immunohistochemical staining of untreated WHHL rabbit liver with pan-cytokeratin antibody showed positive staining of bile ducts with no staining of hepatocytes (a-c). Magnification (a) 40x, scale bar 500 $\mu$ m; (b) 100x, scale bar 200 $\mu$ m and (c) 200x, scale bar 100 $\mu$ m.

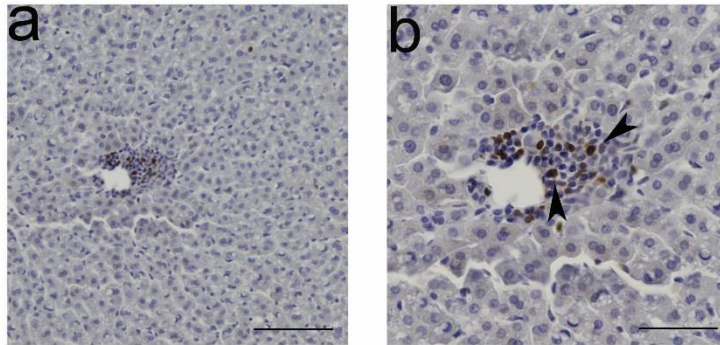

**Supplementary Figure S5. Immunohistochemical staining for proliferating cells.**

Proliferating cells were seen in AAV2-control rabbit liver with Ki-67 staining localizing in areas of inflammatory cells (arrowheads). Magnification (a) 100x, scale bar 200 $\mu$ m and (b) 200x, scale bar 100 $\mu$ m.



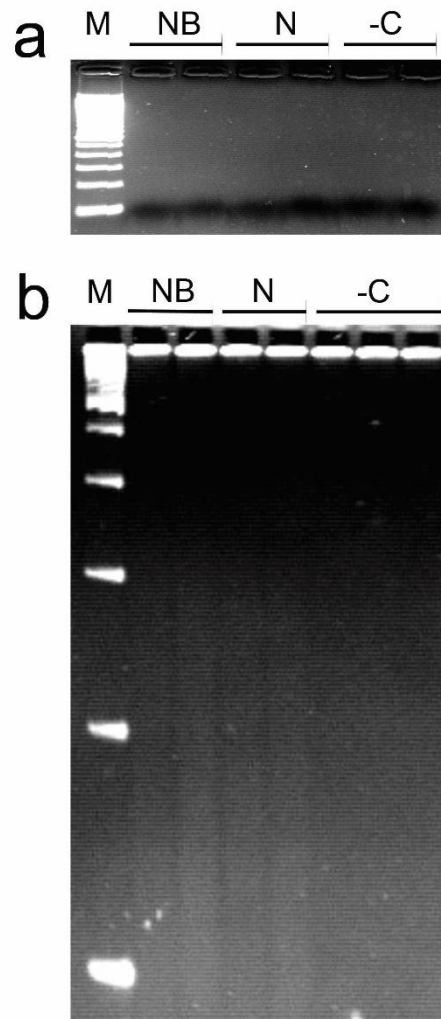

**Supplementary Figure S6. LAM-PCR analysis for provirus integration in nephroblastoma of the kidney.** No provirus could be detected by vector-LTR nested PCR (a) or linear-amplification mediated PCR (b) from a nephroblastoma tumour found in a LV-control transduced rabbit. M: 100bp ladder, NB: nephroblastoma, N: normal tissue section, -C: H<sub>2</sub>O control.

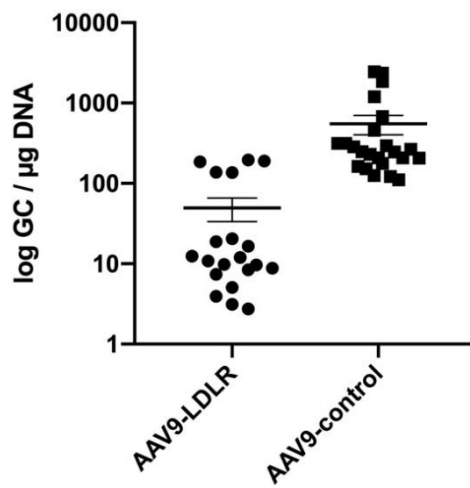

**Supplementary Figure S7. Copy numbers in liver one year after AAV9-rLDLR and AAV9-control gene transfers.** PCRs were run 2-3 times for each animal. AAV9-LDLR (n=20, 1-3 liver lobes per animal) and AAV9-control (n=23, 1-3 liver lobes per animal). Lines in the scatter graph indicate mean  $\pm$  SEM.
